## The effects of terminal tagging on homomeric interactions of the sigma 1 receptor

Hideaki Yano<sup>1,\*</sup>, Leanne Liu<sup>1</sup>, Sett Naing<sup>1</sup>, Lei Shi<sup>1,\*</sup>

<sup>1</sup>Computational Chemistry and Molecular Biophysics Unit, National Institute on Drug Abuse -  
Intramural Research Program, National Institutes of Health, Baltimore, Maryland, United States

\*co-corresponding authors

## Abstract

The sigma 1 receptor ( $\sigma$ 1R) has been implicated in cancers, neurological disorders, and substance use disorders. Yet, its molecular and cellular functions have not been well-understood. Recent crystal structures of  $\sigma$ 1R reveal a single N-terminal transmembrane segment and C-terminal ligand-binding domain, and a trimeric organization. Nevertheless, outstanding issues surrounding the functional or pharmacological relevance of  $\sigma$ 1R oligomerization remain, such as the minimal protomeric unit and the differentially altered oligomerization states by different classes of ligands. Western blot (WB) assays have been widely used to investigate protein oligomerizations. However, the unique topology of  $\sigma$ 1R renders several intertwined challenges in WB. Here we describe a WB protocol without temperature denaturation to study the ligand binding effects on the oligomerization state of  $\sigma$ 1R. Using this approach, we observed unexpected ladder-like incremental migration pattern of  $\sigma$ 1R, demonstrating preserved homomeric interactions in the detergent environment. We compared the migration patterns of intact  $\sigma$ 1R construct and the C-terminally tagged  $\sigma$ 1R constructs, and found similar trends in response to drug treatments. In contrast, N-terminally tagged  $\sigma$ 1R constructs show opposite trends to that of the intact construct, suggesting distorted elicitation of the ligand binding effects on oligomerization. Together, our findings indicate that the N-terminus plays an important role in eliciting the impacts of bound ligands, whereas the C-terminus is amenable for modifications for biochemical studies.

## 1. Introduction

The sigma 1 receptor ( $\sigma$ 1R) is a structurally unique transmembrane protein found in the endoplasmic reticulum (ER) and is associated with intracellular membranes in which it has been posited to act as a molecular chaperone [1]. Although it is broadly distributed in many different tissues and cell types, it is particularly enriched in the central nervous system [2].  $\sigma$ 1R has been implicated in cancer, neurodegenerative diseases, and psychostimulant abuse, and is thus considered a promising therapeutic target [3]. Despite its physiological and pharmacological significance, the structure-function relationships of  $\sigma$ 1R are poorly understood. The recent crystal structures of  $\sigma$ 1R in complexes with a variety of ligands provide the foundation for mechanistic elucidation of its function at the molecular level [4; 5]. They shed light on the conformation and homomeric status of  $\sigma$ 1R in the membrane environment. However, functional categorizations of  $\sigma$ 1R ligands remain challenging [6]. Both the differences in intra- or extracellular environments in various  $\sigma$ 1R assays and the lack of functional readouts detecting changes in  $\sigma$ 1R itself may have contributed to the difficulty in reaching consensus conclusions. Thus, it begs the need for an assay that directly monitors changes occurring in  $\sigma$ 1R.

By focusing on  $\sigma$ 1R itself, we have developed a bioluminescence resonance energy transfer (BRET)-based assay to categorize  $\sigma$ 1R ligands based on presumed changes in  $\sigma$ 1R- $\sigma$ 1R interactions [7]. However, the underlying molecular mechanism could not be directly derived from the BRET signal changes. Instead, the specific oligomerization states were characterized by western blot (WB) [7]. This biochemical approach has the advantages of being capable of quantifying the sizes and intensities of migration bands to provide stoichiometric information on homomeric oligomerization, and of allowing comparison across tightly controlled experimental conditions or different pharmacological treatments. In both BRET and WB,  $\sigma$ 1R has been subjected to end tagging. However, studies have shown that a bulky protein tag on the N-terminus

yields aberrant localization and function, while the C-terminal protein tagging appeared to be permissive and largely retained its function [8].

In the current study, we investigated the effects of N- and C-terminal tagging on the cellular function of  $\sigma$ 1R, in particular its homomeric interactions, in order to evaluate the validity of using such constructs in *in vitro* assays. We optimized a WB protocol to detect ligand-induced  $\sigma$ 1R oligomerization and compare the results for terminally tagged and unmodified wildtype (WT)  $\sigma$ 1R constructs.

## 2. Materials and methods

### DNA constructs, transfection, and cell culture

HEK293T  $\Delta\sigma$ 1R cells were generated using the CRISPR-Cas9 gene deletion method (Santa Cruz). Human  $\sigma$ 1R is tagged in pcDNA3.1 plasmid with Myc, NanoLuciferase (Nluc), or mVenus, either N-terminally or C-terminally in frame without any linker (Myc- $\sigma$ 1R, Nluc- $\sigma$ 1R,  $\sigma$ 1R-Myc,  $\sigma$ 1R-Nluc, or  $\sigma$ 1R-mVenus). All constructs were confirmed by sequence analysis. For western blot and radioligand binding, 5  $\mu$ g (otherwise noted) of terminally tagged and unmodified  $\sigma$ 1R plasmid was transfected using lipofectamine 2000 (Invitrogen) for HEK 293T  $\Delta\sigma$ 1R cells in a 10 cm plate. For drug induced BRET, a constant amount of total plasmid cDNA (15  $\mu$ g) in 1:24 (donor:acceptor ratio for  $\sigma$ 1R-Nluc and  $\sigma$ 1R-mVenus) was transfected in HEK 293T  $\Delta\sigma$ 1R cells using PEI in a 10 cm plate. Cells were maintained in culture with Dulbecco's modified Eagle's medium supplemented with 10% fetal bovine serum and kept in an incubator at 37°C and 5% CO<sub>2</sub>. Experiments were performed approximately 48 h post-transfection.

### Western blot

HEK293T  $\Delta\sigma$ 1R cells were grown as reported [7] and transiently transfected with the unmodified  $\sigma$ 1R, N-terminally tagged Myc- $\sigma$ 1R, N-terminally tagged Nluc- $\sigma$ 1R, C-terminally tagged  $\sigma$ 1R-Myc, or C-terminally tagged  $\sigma$ 1R-Nluc in 10 cm plates. After 48 hr of growth, confluent cells were harvested in Hank's Balanced Salt Solution (HBSS), centrifuged at 900 x g for 8 min, and resuspended in HBSS. The cells were then incubated in 1  $\mu$ M haloperidol, 1  $\mu$ M PD 144418, 10  $\mu$ M (+)-pentazocine, or 1% DMSO for 1 h at room temperature. The samples were then centrifuged at 900 x g for 4 min and resuspended in lysis buffer (150 mM NaCl, 1.0% triton X-100, 0.5% sodium deoxycholate, Tris 50 mM, pH 7.5, and protease inhibitors (Roche, catalog# 11697498001)). The samples were sonicated, incubated on ice for 30 min, and centrifuged at 20,000 x g for 30 min. Supernatants were transferred to new tubes. Protein concentrations of the

supernatants were determined with Bradford protein assay (Bio-rad, Hercules, CA). Supernatants were mixed with 4x  $\beta$ -mercaptoethanol Laemmli sample buffer to a final 25  $\mu$ g protein/sample. Samples were electrophoresed on 10% polyacrylamide Tris-glycine gels (Invitrogen) with running buffer (25 mM Tris, 192 mM glycine and 0.1% SDS, pH 8.3, Invitrogen). Proteins were transferred to PVDF membranes (Invitrogen, catalog# IB24002) and immunoblotted with antibodies. anti-GAPDH or anti-actin was used as a loading control. The product information and dilutions of primary and secondary antibodies used are summarized in Supplementary Table 1. Blots were imaged using Odyssey LI-COR scanner and analyzed with LI-COR Image Studio™.

### **Radioligand binding assay**

Membrane fraction of HEK293T  $\Delta\sigma$ 1R cells was prepared as previously described [7]. The radioligand incubation was carried out in 96-well plates containing 60  $\mu$ L fresh Earle's Balanced Salts Solution (EBSS) binding buffer (8.7 g/l Earle's Balanced Salts without phenol red (US Biological) and 2.2 g/L sodium bicarbonate, pH to 7.4), 20  $\mu$ L of (+)-pentazocine (varying concentrations), 100  $\mu$ L membranes (25  $\mu$ g/well total protein), and 20  $\mu$ L of radioligand diluted in binding buffer (1 nM [ $^3$ H]-(+)-pentazocine (American Radiolabeled Chemicals), final concentration) for each well. Concentrations for non-radioactive (+)-pentazocine were: 1 mM, 100  $\mu$ M, 10  $\mu$ M, 1  $\mu$ M, 100 nM, 10 nM, 1 nM, and 0.1 nM in EBSS with 10% DMSO. Total binding was determined with 1% DMSO vehicle (final concentration). All compound dilutions were tested in triplicate, and samples were incubated for 120 min at room temperature. The reactions were terminated by filtration through Perkin Elmer Uni-Filter-96 GF/B, presoaked in 0.05% PEI for 120 min, and the 96-well filter plates were counted in Perkin Elmer MicroBeta Microplate Counter as described [7] with counter efficiency at 31% for [ $^3$ H]-(+)-pentazocine.  $K_d$  and  $B_{max}$  values were determined from at least three independent experiments.

### **Bioluminescence resonance energy transfer (BRET) assay**

Drug-induced BRET is conducted as reported previously [9]. Briefly, cells were prepared in 96-well plates as in acceptor-saturating BRET. 5  $\mu$ M coelenterazine h was added to each well. Three minutes after addition of coelenterazine h (Nanolight), ligands [(+)-pentazocine (Sigma), PD 144418 (Tocris), and haloperidol (Tocris)] were added to each well in serial dilution. BRET was measured as a ratio between measurements at 535 nm for fluorescence and at 485 nm for luminescence using a Pherastar FSX reader (BMG). Results are calculated for the BRET change (BRET ratio for the corresponding drug minus BRET ratio in the absence of the drug).  $E_{\max}$  values are expressed as the basal subtracted BRET change in the dose-response graphs.

### 3. Results

#### **The unmodified WT shows distinct bands up to densities corresponding to octamers.**

In this study, we used an antibody-based western blot (WB) approach to detect the configurational changes of  $\sigma$ 1R oligomerization in response to ligand binding and to the modification of the N- or C-terminus. To exclude the confounding effects of endogenous  $\sigma$ 1R, we heterologously expressed (i.e., rescued) various  $\sigma$ 1R constructs in  $\sigma$ 1R-null ( $\Delta\sigma$ 1R) HEK293T cells (see Methods).

In WB assays, samples would typically be heated, often boiled, in a reducing buffer condition to allow efficient epitope interaction with an antibody in the following step. Indeed, the samples in previous WB assays of  $\sigma$ 1R have also been subjected to heating [10; 11; 12], unless using the native gel approach [7]. In this study, we found that by keeping samples on ice before running them on sodium dodecyl sulfate–polyacrylamide gel electrophoresis (SDS-PAGE), we could observe homomeric  $\sigma$ 1R interactions when using  $>5 \mu\text{g}$  plasmid DNA per 10-cm plate in transfection (Supplementary Figure 1D). Compared to samples receiving boiling treatment (100 °C) that resulted in a single monomer band ( $\sim 25 \text{ kDa}$ ), the samples kept on ice showed a unique ladder-like pattern that corresponds to distinct bands from a monomer up to an octamer ( $\sim 200 \text{ kDa}$ ) of  $\sigma$ 1R in WB (Supplementary Figure 2A). As expected, none of the bands were observed in the untransfected  $\Delta\sigma$ 1R cells (Figure 1A). Therefore, we used the on-ice condition (4 °C) for the rest of this study unless otherwise noted.

In addition to the B-5 (Santa Cruz)  $\sigma$ 1R antibody, we chose three other commercially available  $\sigma$ 1R antibodies based on their disparate target epitopes (Supplementary Figure 1). We compared the capabilities of these antibodies to detect distinct  $\sigma$ 1R oligomer bands in our assay conditions. Similar to B-5, D4J2E (Cell Signaling; Supplementary Figure 1C) antibodies also showed a unique ladder-like pattern but not as distinct as B-5.



### **The C-terminally tagged constructs show distinct oligomer bands as well.**

Previous reports suggest that C-terminal tagging of  $\sigma$ 1R does not interfere with localization and function of  $\sigma$ 1R [8; 12; 13]. In addition to our previous  $\sigma$ 1R construct used in the BRET assay in which Nluc is attached to the C-terminus ( $\sigma$ 1R-Nluc) [7], to test the C-terminal tagging's effect on the  $\sigma$ 1R- $\sigma$ 1R interaction, we also generated the  $\sigma$ 1R-myc construct, which has a shorter tag at the C-terminus. Both  $\sigma$ 1R-Nluc and  $\sigma$ 1R-myc exhibit ladder-like patterns similar to the unmodified WT  $\sigma$ 1R; the bands range from ~26 kDa (monomer) to ~208 kDa (octamer) for  $\sigma$ 1R-myc and ~44 kDa (monomer) to ~352 kDa (octamer) for  $\sigma$ 1R-Nluc (Figure 1A). To confirm the same mobility and density of the bands visualized by an antibody targeting a different epitope, the anti-myc antibody was used against  $\sigma$ 1R-myc. In this WB, the bands are generally brighter, which may indicate a stronger epitope affinity of the anti-myc antibody than that of the anti- $\sigma$ 1R antibody (Figure 1B).

To quantify the distribution of  $\sigma$ 1R in each oligomeric population for each condition, we measured the intensity of each band (see Methods). Similar patterns were observed across the unmodified and C-terminally tagged constructs (Figure 1C-D). Interestingly, the higher-order bands (i.e., tetramer, pentamer, and hexamer), which are larger than the trimer revealed by the  $\sigma$ 1R crystal structures [5], are more intense for  $\sigma$ 1R-Nluc and  $\sigma$ 1R-myc than the unmodified construct (Figure 1C).

To confirm that the integrity of the ligand binding site and likely the C-terminal domain of the  $\sigma$ 1R constructs are not affected by tagging or the WB condition, radioligand binding assay was conducted with [<sup>3</sup>H](+)-pentazocine. Under the same conditions as the WB (i.e., transfection and protein input), the unmodified and C terminally-tagged constructs have virtually the same expression levels and only subtly different  $K_d$  (Figure 1E).

**The unmodified WT and C-terminally tagged constructs show similar extents of pharmacological changes in higher-order bands.**

Previously, we have found that  $\sigma$ 1R undergoes ligand-induced changes of the oligomerization states [7]. Here, we investigated the effect of ligand binding on the migration pattern in WB.  $\sigma$ 1R ligands were added to  $\sigma$ 1R-expressing cells and incubated for 1h before proceeding to sample preparation. For unmodified WT  $\sigma$ 1R, both haloperidol and PD144418 decreased the intensities of the higher-order bands (i.e., tetramer, pentamer, and hexamer), while (+)-pentazocine increased their intensities (Figure 2A-C). These results are consistent with our previous findings using BRET assays that categorized haloperidol, PD144418, and 4-PPBP into haloperidol-like ligands and (+)-pentazocine and PRE-084 into pentazocine-like ligands [7]. Consistently, both  $\sigma$ 1R-myc and  $\sigma$ 1R-Nluc showed similar extents of changes in the higher-order bands, in which haloperidol and PD144418 decreased and (+)-pentazocine increased the relative densities of the higher-order bands (Figure 2D-I). The opposing effects of these  $\sigma$ 1R ligands are consistent with our previous study [7].

In contrast to samples prepared on ice, temperature increases in the sample buffer decreased the densities of the dimer and above bands, indicating that  $\sigma$ 1R- $\sigma$ 1R interaction is disrupted by the temperature change (Supplementary Figure 2A). In the presence of different ligands, the 70°C treatment completely monomerized  $\sigma$ 1R as well, while the monomer densities across different ligand treatments are similar (Supplementary Figure 2B). Thus, the  $\sigma$ 1R expression level is unlikely changed by the ligands, because changes in the total copy number would affect monomer band density.

**The N-terminally tagged myc- $\sigma$ 1R and Nluc- $\sigma$ 1R exhibit very weak higher order bands.**

As opposed to the C-terminal tagging, it has been reported that N-terminal tagging of  $\sigma$ 1R interferes with the localization of  $\sigma$ 1R [8]. To study the effect of N-terminal tagging on gel mobility,

in addition to our previously studied Nluc- $\sigma$ 1R [7], we generated the myc- $\sigma$ 1R construct. Compared to the unmodified WT construct, myc- $\sigma$ 1R showed significantly fainter bands for trimer and higher-order bands. In both myc- $\sigma$ 1R and Nluc- $\sigma$ 1R, the higher-order bands have much less relative distributions than the unmodified construct (Figure 3A,C). When incubated with anti-myc antibody, the fraction of total density that was present in higher-order bands for myc- $\sigma$ 1R did not notably improve (Figure 3B, D). Nluc- $\sigma$ 1R also showed reduced intensities in higher-order bands, which is more apparent when compared to the density distribution of the C-terminally tagged  $\sigma$ 1R-Nluc (Figure 3A,C and Figure 1A,C). Even though the oligomerization states are drastically different from their corresponding C-terminal tagged constructs, radioligand binding results showed  $K_d$  and  $B_{max}$  are not significantly different from those of the unmodified construct (Figure 3E). Therefore, the significantly decreased relative densities of higher-order bands in WB are likely due to changes in receptor conformation and epitope exposure by the N-terminal tagging.

### **The N-terminally tagged constructs show substantially different pharmacology from unmodified WT $\sigma$ 1R.**

Next, we studied the pharmacology of myc- $\sigma$ 1R and Nluc- $\sigma$ 1R in gel mobility to assess the effects by short and long N-terminal tagging. For myc- $\sigma$ 1R, haloperidol increased the higher-order bands while it diminished the monomer band (Figure 4A-C). PD144418 did not affect the relative density of each band, compared to the DMSO treated sample. (+)-pentazocine decreased the intensities of higher-order bands while increasing that of the monomer band. For Nluc- $\sigma$ 1R, haloperidol increased the higher order bands slightly while PD144418 showed effectively no change. (+)-pentazocine showed an increased monomer band (Figure 4D-F). Overall, there are similarities between myc- $\sigma$ 1R and Nluc- $\sigma$ 1R for their pharmacology. Haloperidol increased the densities of higher-order bands, while (+)-pentazocine increased that of monomer bands. However, these pharmacological trends are opposite to that of the unmodified  $\sigma$ 1R (Figure 2A-C), indicating that

the N-terminal tagging may interfere with how ligand binding propagates the conformational changes within  $\sigma$ 1R or directly interferes with the formation of oligomers.

#### 4. Discussion

$\sigma$ 1R has been extensively studied at molecular level using biochemical and pharmacological approaches [10; 13; 14; 15; 16; 17; 18]. In this study we investigated the effects of terminal tagging on  $\sigma$ 1R oligomerization and pharmacology. In particular, in conjunction with WB, the end-tagged constructs revealed the ability of N-terminal modification to interfere with the oligomerization of  $\sigma$ 1R. SDS-PAGE WB is one of the most commonly used biochemical assays to quantify protein density. Because of detergent solubilization, protein-protein interactions in their native cellular environment can be disrupted in many instances. Here, however, by maintaining samples on ice, we were able to preserve homomeric  $\sigma$ 1R- $\sigma$ 1R interactions and visualize discrete bands corresponding to oligomers as large as octamers by using an antibody (B-5) targeting an epitope at residues 136-169 of  $\sigma$ 1R. As a technical note, after the antibody has been stored for a long time, the antibody staining becomes dimmer and the higher-order bands cannot be visualized, potentially due to degradation (Supplementary Figure 1E-F). Interestingly, the other antibodies against distinct epitopes from different vendors resulted in different visualization patterns indicating the corresponding epitopes may be differentially exposed in different oligomerization states, while residue 136-169 might always be exposed. Although intriguing, these antibodies were not further pursued because of their significantly lower band intensities. In general, the WB method described herein is deemed useful to study  $\sigma$ 1R pharmacology since ligand-induced conformational changes, particularly in higher-order bands, can be quantitatively evaluated.

We have previously reported a BRET-based proximity assay to study  $\sigma$ 1R pharmacology in HEK293T cells [7]. The C-terminally tagged  $\sigma$ 1R-Nluc construct used in that study showed a similar response to ligands in the migration pattern of higher-order bands as the unmodified  $\sigma$ 1R, demonstrating that BRET responses very likely reflect the configurational changes in  $\sigma$ 1R oligomerization observed in the unmodified  $\sigma$ 1R. In current study, we used  $\Delta\sigma$ 1R HEK293T cells. By repeating the BRET experiment in  $\Delta\sigma$ 1R HEK293T cells transfected with  $\sigma$ 1R-Nluc and  $\sigma$ 1R-

Venus (Supplementary Figure 3), we found the  $\sigma$ 1R pharmacology effectively remained the same as the previously reported BRET results in HEK293T cells [7]. Given that in the BRET assays, haloperidol and PD144418 increased BRET signals while in the WB assays, they decreased higher-order band densities and increased lower-order band densities, we hypothesize that the BRET readouts recapitulate the changes in the lower-order populations. In that regard, the dimer and trimer populations comprise 48.9% in haloperidol and 24.3% in PD144418, compared to 13.7% in DMSO (Figure 2H). The pattern can be correlated with the BRET<sub>max</sub> order, in which haloperidol shows higher BRET<sub>max</sub> than PD144418 (Supplementary Figure 3).

We observed that the total signal (*i.e.*, summation of band densities up to hexamer) increased with (+)-pentazocine (38%) and decreased with haloperidol (-25%) or PD144418 (-23%) compared to DMSO lane (Figure 2A). Since there is no change in  $\sigma$ 1R expression level across different ligand conditions (Supplementary Figure 2B), these changes in total signal, primarily due to changes in the higher-order bands, are caused by changes in either the copy number and/or changes in epitope accessibility in higher-order oligomers. If there is an increase in copy number of higher order bands, the mobilized populations should equal the collective decrease in lower-order bands. However, as we only observed a weak complementary decrease in lower-order bands, we postulate that changes in the epitope affinity in higher-order populations of  $\sigma$ 1R plays a role in increased higher-order band intensities.

In addition, we found that the N-terminal modification limits higher-order interactions of  $\sigma$ 1R in our solubilization condition, consistent with the previously reported detrimental effects of N-terminal tagging or point mutation on the cellular localization and function [8]. It is noteworthy that there is a putative Arg-Arg ER retention signal [19] at the N-terminus of  $\sigma$ 1R. We propose that the steric hindrance of the N-terminally tagged protein may interfere with the recognition of Arg-Arg tandem residues at the 7<sup>th</sup> and 8<sup>th</sup> positions. This interference is potentially akin to some other membrane proteins that escape from ER retention due to its Arg-Arg motif masked by nearby domains (e.g.,

GABA<sub>B</sub> receptor [20]). Despite its probable mislocalization, we presume that the folding of  $\sigma$ 1R should only be modestly affected by the N-terminal tagging because of the preserved binding pocket considering the only lightly-affected  $K_d$  compared to that of the unmodified construct. Therefore, the reduced  $\sigma$ 1R- $\sigma$ 1R interaction may arise from the membrane environment in which  $\sigma$ 1R is localized such that the  $\sigma$ 1R density may be too low to find an interacting partner. Further, while the exterior of the barrel motif of the C-terminal domain has been revealed by the crystal structures to be the interface for trimer, it is likely other part of the of the protein involves in forming other oligomer states, such as the N-terminus and N-terminal transmembrane helix [21]. The N-terminal tagging may potentially bias the protein towards dimer formation by facilitating the interactions between two monomers at their N-terminal region.

### **Author contribution**

H.Y. and L.S. designed the study. L.L., S.N., and H.Y. performed the experiments. All authors took part in interpreting the results. H.Y. wrote the initial draft, with L.L. and L.S. participating in revising the manuscript.

### **Acknowledgements**

We would like to thank Drs. Yoki Nakamura and Tsung-Ping Su at NIDA for collaborating with us to develop  $\Delta\sigma 1R$  HEK293T cells used in this assay and sharing their image detection instrument (LI-Cor). We thank Dr. Andrew Fant for insightful discussions. Support for this research was provided by the National Institute on Drug Abuse–Intramural Research Program, Z1A DA000606-03 (L.S.).



## Figures and figure legends

**Figure 1.** SDS-PAGE mobility comparison among the unmodified and C-terminally tagged  $\sigma$ 1R constructs. **A-B.** Red bands are visualized by anti- $\sigma$ 1R (**A**) or anti-myc (**B**) antibodies on 10% SDS-PAGE (protein standard,  $\sigma$ 1R,  $\sigma$ 1R-myc,  $\sigma$ 1R-Nluc,  $\sigma$ 1R KO cells). Anti-GAPDH bands are shown in green for equal loading. **C-D.** Quantification of band intensities normalized to total signals within each lane for  $\sigma$ 1R (**C**) and myc (**D**) blots. The intensities of bands up to hexamer were normalized to the total summation of the densities within the same lane. Due to a close migration pattern in a 10% acrylamide gel, higher order bands past hexamer were not resolvable for quantifications. **E.** Radioligand binding properties of [ $^3$ H] (+)-pentazocine for  $\sigma$ 1R,  $\sigma$ 1R-myc, and  $\sigma$ 1R-Nluc.

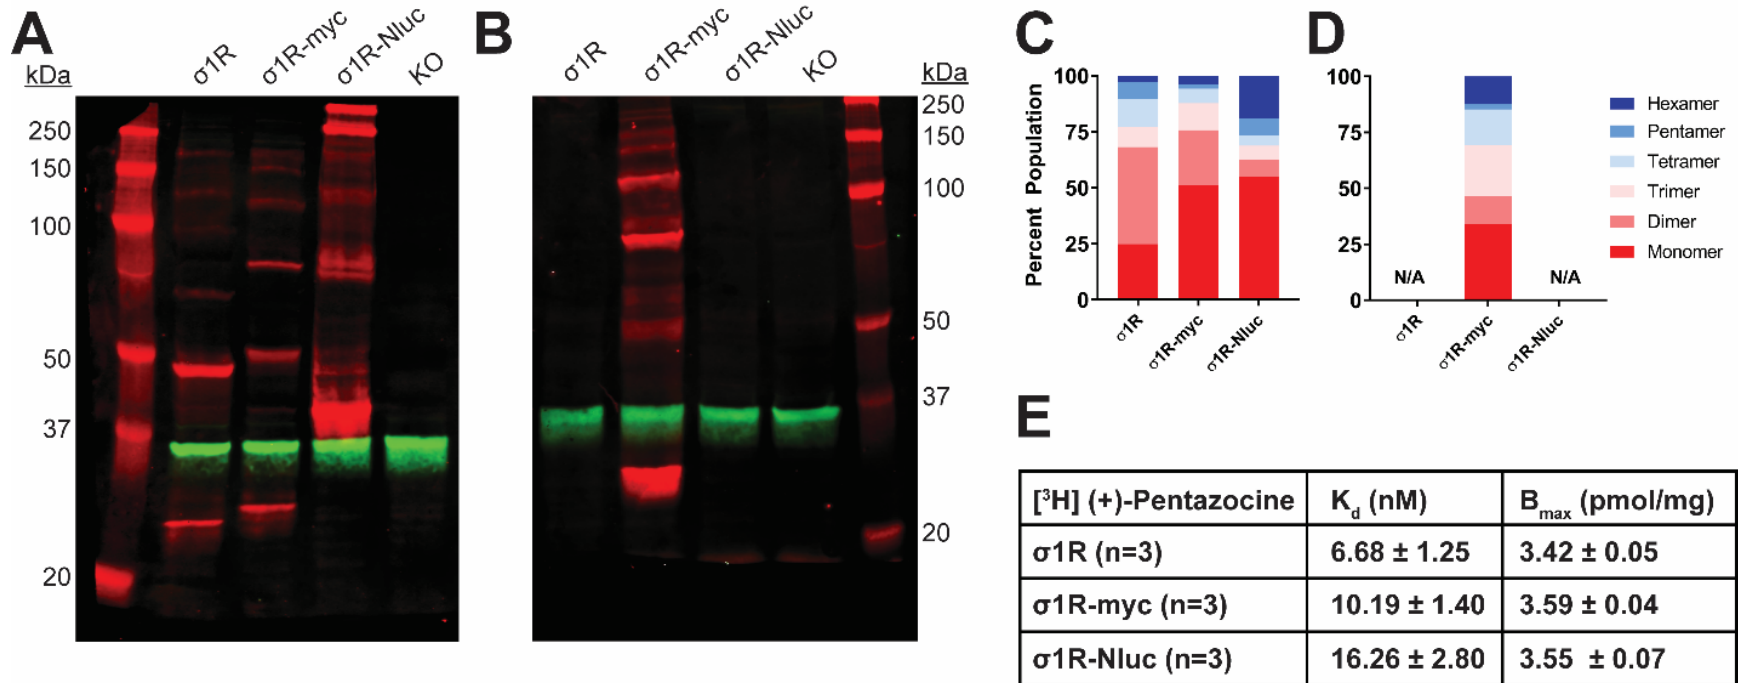

**Figure 2.** Pharmacological effects on SDS-PAGE mobility among the unmodified and C-terminally tagged  $\sigma$ 1R constructs. Results for the unmodified (**A-C**), C-terminally myc-tagged (**D-F**), and C-terminally Nluc tagged (**G-I**) constructs are shown. **A, D, G.** Red bands are visualized by anti- $\sigma$ 1R (**A, G**) or anti-myc (**D**) antibodies and green bands are visualized by anti-GAPDH (**A, D, G**) antibodies on 10% SDS-PAGE (protein standard, haloperidol, PD 144418, (+)-pentazocine, DMSO vehicle). **B, E, H.** Quantification of band intensities normalized to total signals within each lane for  $\sigma$ 1R (**B, H**) and myc (**E**) blots. **C, F, I.** Pharmacological changes in higher order densities corresponding to tetramers, pentamers, and hexamers normalized to DMSO vehicle (haloperidol, PD 144418, (+)-pentazocine, DMSO vehicle).

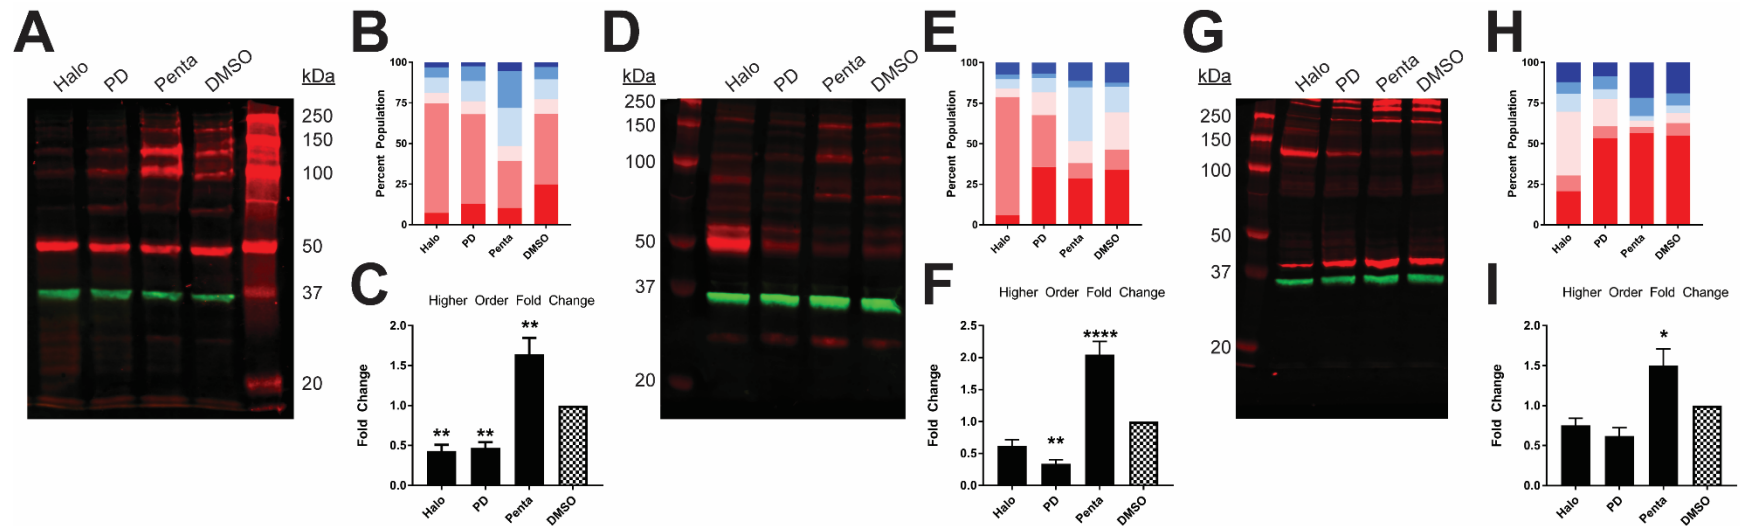

**Figure 3.** SDS-PAGE mobility comparison among the unmodified and N-terminally tagged  $\sigma$ 1R constructs. **A-B.** Red bands are visualized by anti- $\sigma$ 1R (**A**) or anti-myc (**B**) antibodies and green bands are visualized by anti-GAPDH (**A-B**) antibodies on 10% SDS-PAGE (protein standard,  $\sigma$ 1R, myc- $\sigma$ 1R, Nluc- $\sigma$ 1R,  $\sigma$ 1R KO cells). **C-D.** Quantification of band intensities normalized to total signals within each lane for  $\sigma$ 1R (**C**) and myc (**D**) blots. **E.** Radioligand binding properties of [ $^3$ H] (+)-pentazocine for  $\sigma$ 1R, myc- $\sigma$ 1R, and Nluc- $\sigma$ 1R.

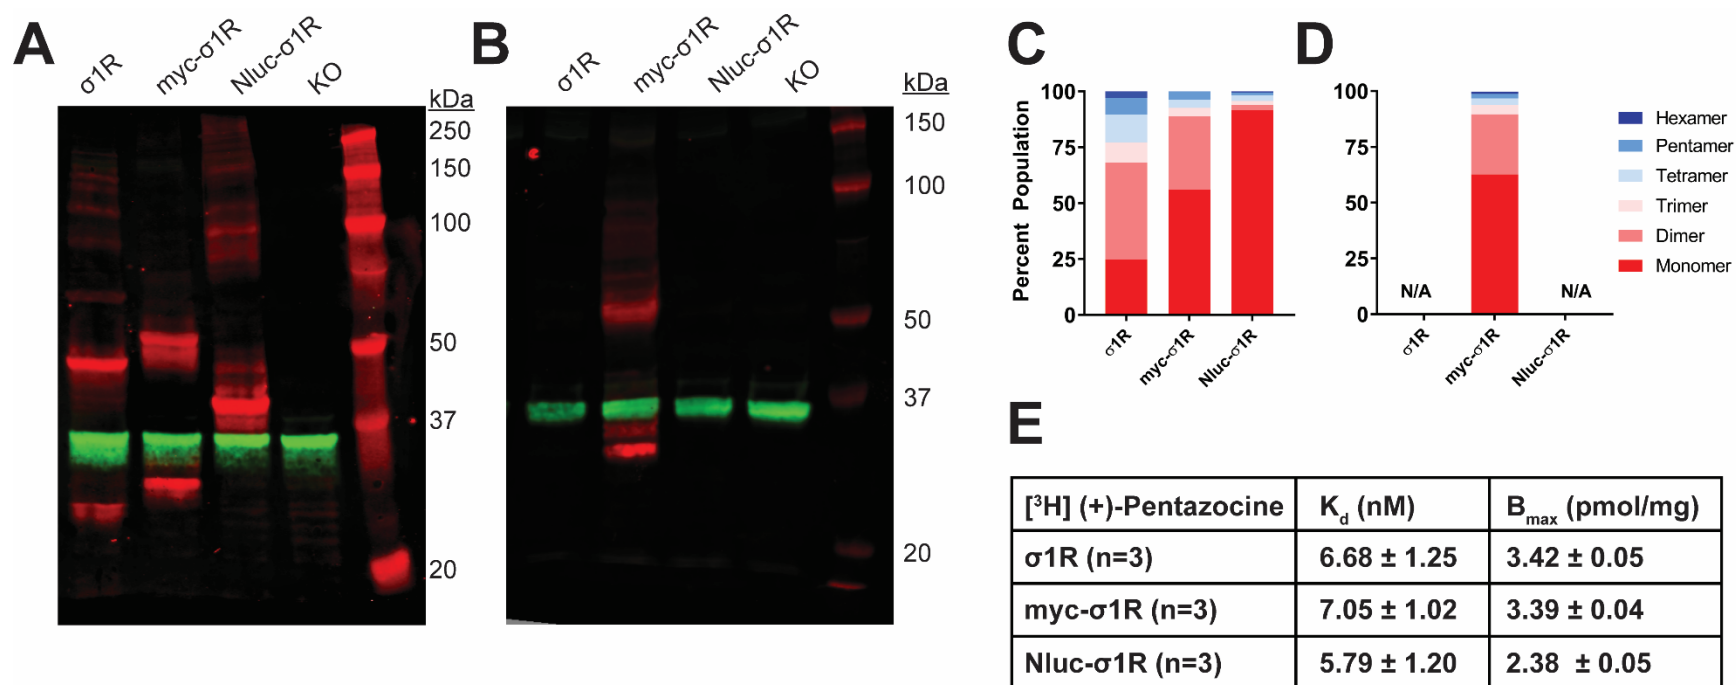

**Figure 4.** Pharmacological effects on SDS-PAGE mobility of the N-terminally tagged  $\sigma$ 1R constructs. Results for the N-terminally myc-tagged (**A-C**), and N-terminally Nluc-tagged (**D-F**) constructs are shown. **A, D.** Red bands are visualized by anti-myc (**A**) or anti- $\sigma$ 1R (**D**) and green bands are visualized by anti-GAPDH (**A, D**) antibodies on 10% SDS-PAGE (protein standard, haloperidol, PD 144418, (+)-pentazocine, DMSO vehicle). **B, E.** Quantification of band intensities normalized to total signals within each lane for myc (**B**) and  $\sigma$ 1R (**E**) blots. **C, F.** Pharmacological changes in higher order densities corresponding to tetramers and above bands normalized to DMSO vehicle (haloperidol, PD 144418, (+)-pentazocine, DMSO vehicle).

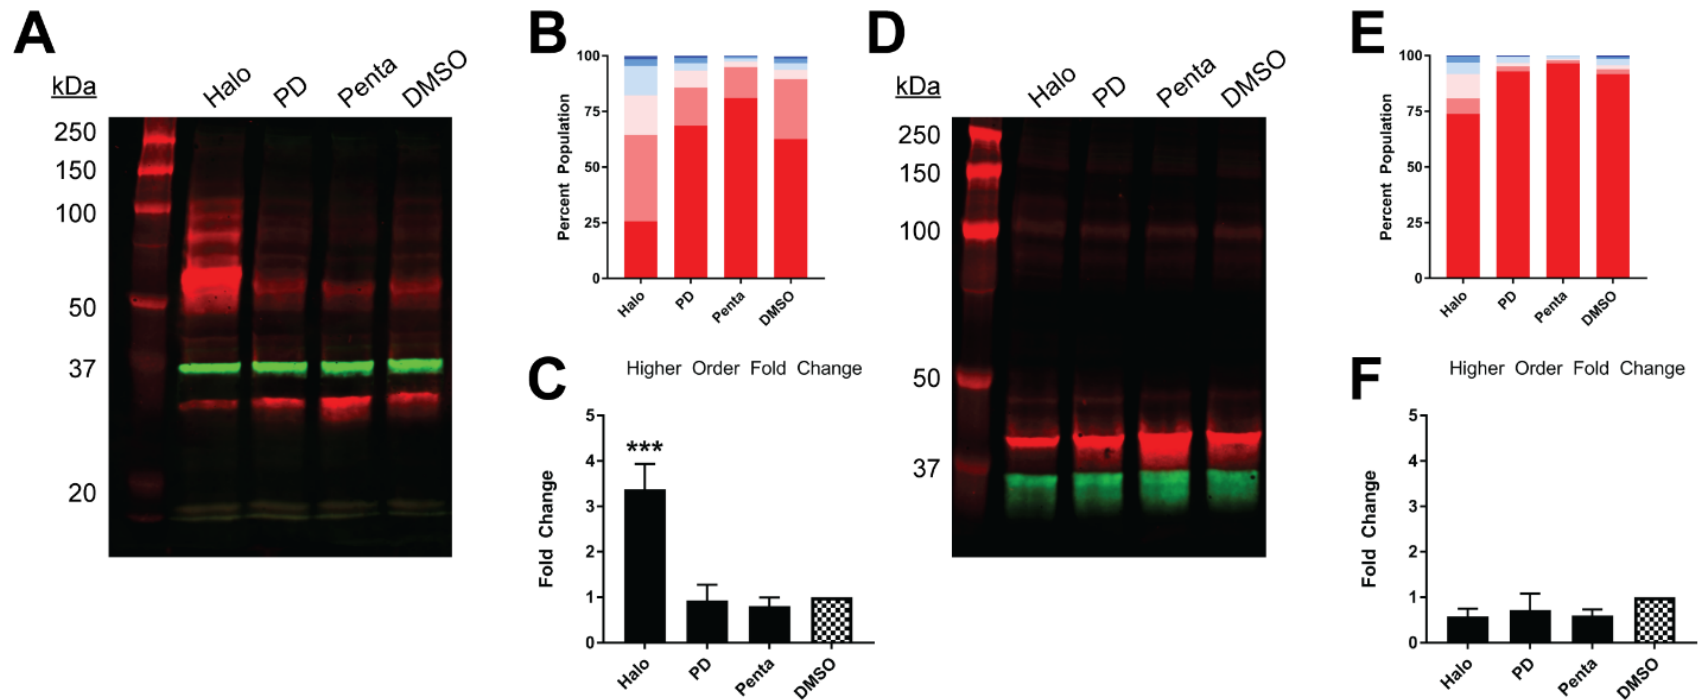

**Supplementary Figure 1.** Immuno-reactivities of commercially available  $\sigma$ 1R antibodies. **A-C.** Green and red bands are visualized by anti- $\sigma$ 1R (**A.** AB 53852, Abcam, **B.** AB 223702, Abcam, **C.** DHJ2E, Cell Signaling) and anti-actin antibodies respectively on 10% SDS-PAGE. **D.** Endogenous  $\sigma$ 1R expressed in WT HEK293T cells or increasing amounts of  $\sigma$ 1R expressed in  $\sigma$ 1R KO cells (1, 5, 8  $\mu$ g) are detected by the anti- $\sigma$ 1R antibody (B-5, Santa Cruz) in red along with GAPDH loading control in green. **E-F.** Immuno-reactivities are diminished over a prolonged storage time (**E.** ~1 month vs. **F.** > 6 months in 4 °C).

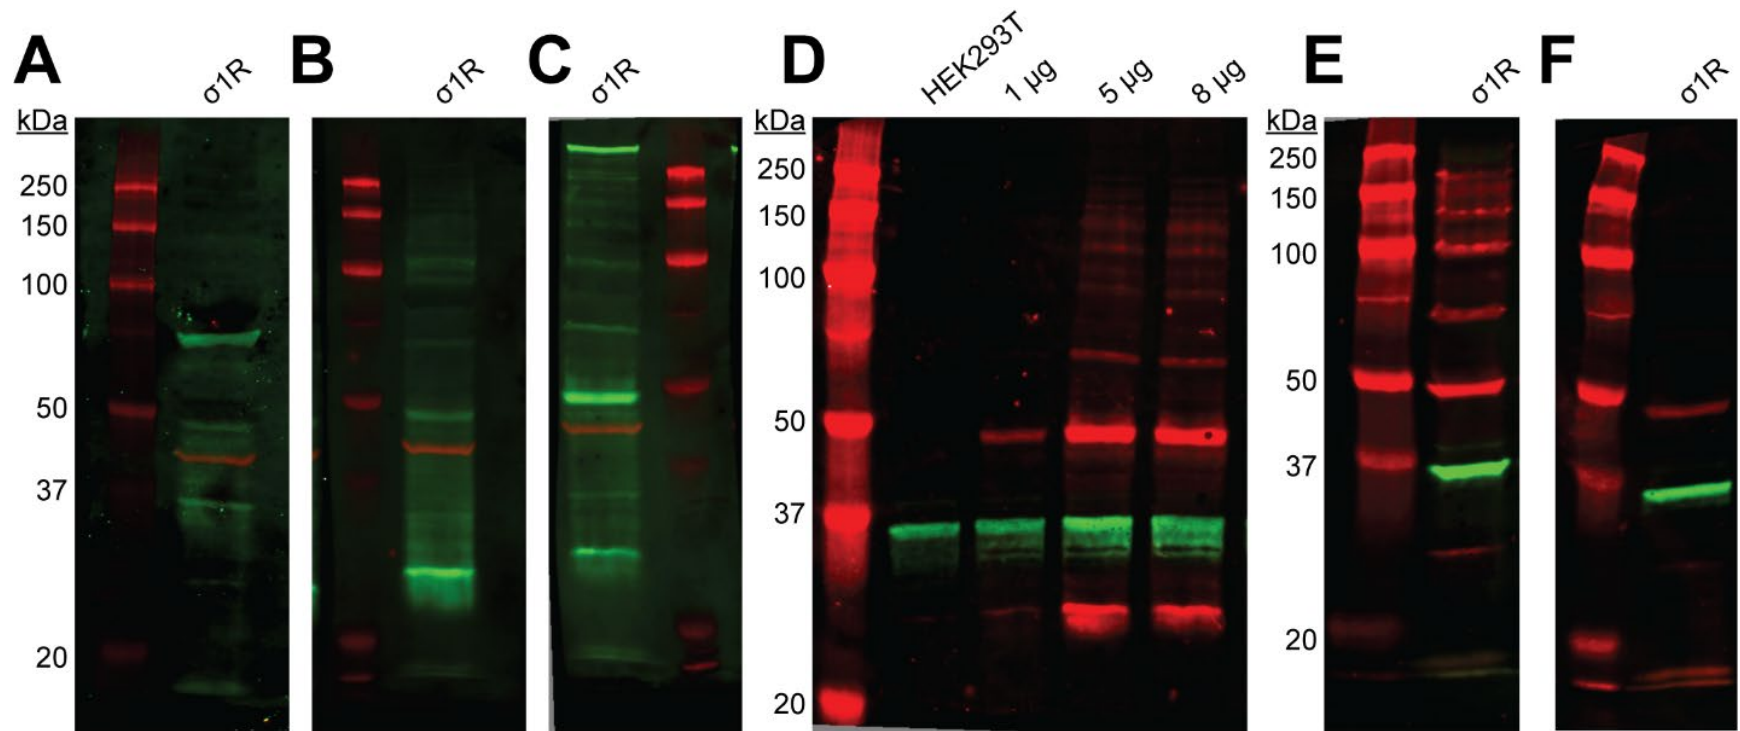

**Supplementary Table 1.**

Product information and dilutions of primary and secondary antibodies

|                                 | Product ID, Vendor    | Epitope (residue numbers) | Dilution          |
|---------------------------------|-----------------------|---------------------------|-------------------|
| <i>Primary antibody</i>         |                       |                           |                   |
| $\sigma$ 1R (mouse monoclonal)  | B-5, Santa Cruz       | 136-169                   | 1:1,000           |
| $\sigma$ 1R (rabbit polyclonal) | AB 53852, Abcam       | C-terminus                | 1:625             |
| $\sigma$ 1R (rabbit polyclonal) | AB 223702, Abcam      | 35-88                     | 1:250             |
| $\sigma$ 1R (rabbit monoclonal) | DHJ2E, Cell Signaling | around 137                | 1:1,000           |
| GAPDH (rabbit monoclonal)       | 14C10, Cell Signaling | C-terminus                | 1:2,000           |
| Actin (mouse monoclonal)        | C-2, Santa Cruz       | 357-375                   | 1:2,000           |
| Myc (mouse monoclonal)          | 9B11, Cell Signaling  | 410-419                   | 1:1,000           |
| <i>Secondary antibody</i>       |                       |                           |                   |
| Donkey $\alpha$ mouse           | IRDye 680RD, LI-COR   |                           | 1:5,000; 1:10,000 |
| Goat $\alpha$ rabbit            | IRDye 800CW, LI-COR   |                           | 1:10,000; 1:5,000 |

**Supplementary Figure 2.** Protein sample preparation at different temperatures. **A-B.** Red and green bands are visualized by anti- $\sigma$ 1R and anti-GAPDH antibodies respectively on 10% SDS-PAGE. **A.** Samples were prepared in increasing temperatures (3, 40, 70, and 100 °C). **B.** Ligand-treated samples were heated at 70 °C for 15 min (protein standard, haloperidol, PD 144418, (+)-pentazocine, DMSO vehicle).

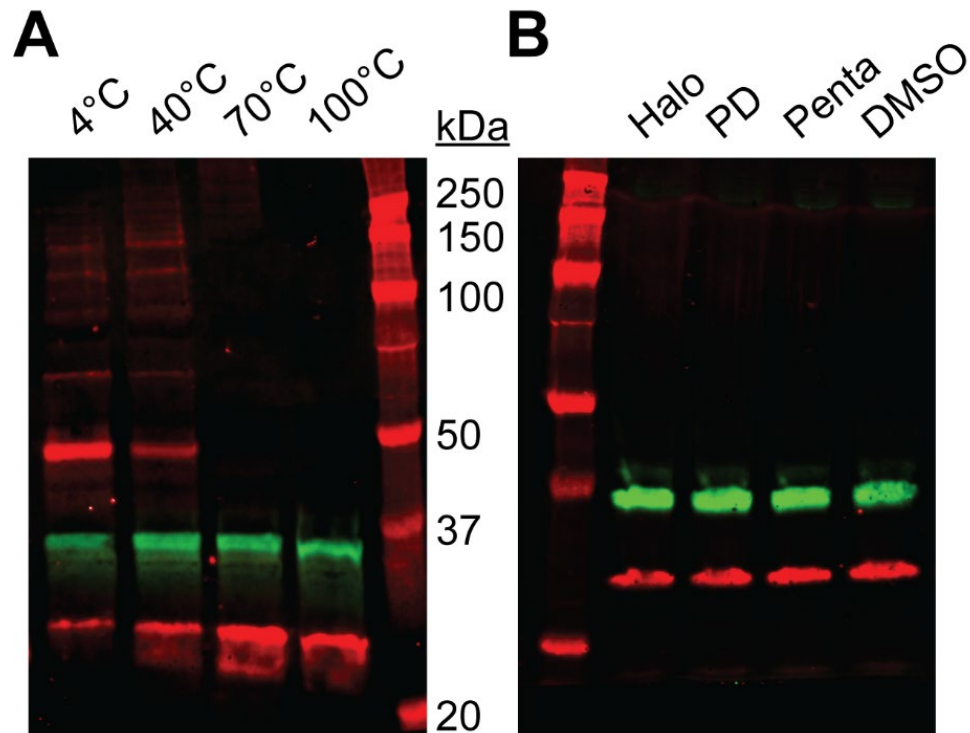

**Supplementary Figure 3. A.** Drug induced changes of  $\sigma$ 1R homomer BRET. Drug induced BRET between the C-terminally tagged  $\sigma$ 1R-Nluc and  $\sigma$ 1R-Venus in  $\sigma$ 1R KO cells is detected at 60 min for (+)-pentazocine (red), haloperidol (blue), and PD144418 (cyan). Data represents mean $\pm$ S.E.M. (n=5 or more).

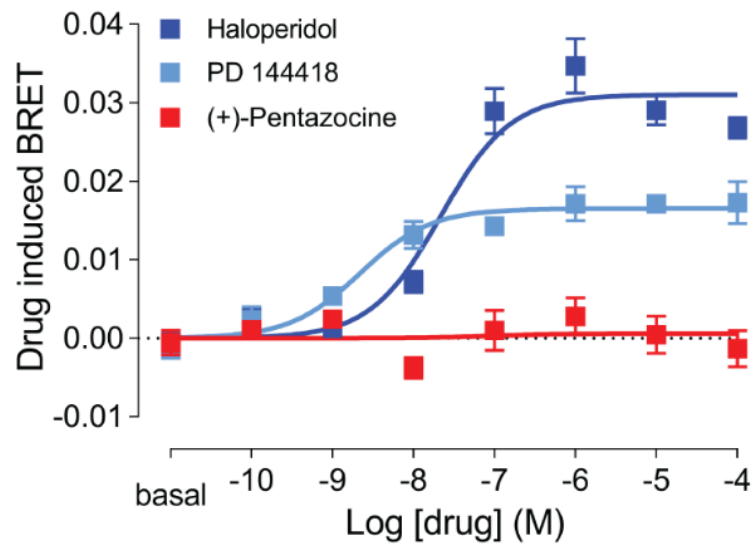



## References

- [1] T.P. Su, T.C. Su, Y. Nakamura, and S.Y. Tsai, The Sigma-1 Receptor as a Pluripotent Modulator in Living Systems. *Trends Pharmacol Sci* 37 (2016) 262-278.
- [2] A.D. Weissman, T.P. Su, J.C. Hedreen, and E.D. London, Sigma receptors in post-mortem human brains. *J Pharmacol Exp Ther* 247 (1988) 29-33.
- [3] T. Maurice, and T.P. Su, The pharmacology of sigma-1 receptors. *Pharmacol Ther* 124 (2009) 195-206.
- [4] H.R. Schmidt, R.M. Betz, R.O. Dror, and A.C. Kruse, Structural basis for sigma1 receptor ligand recognition. *Nat Struct Mol Biol* 25 (2018) 981-987.
- [5] H.R. Schmidt, S. Zheng, E. Gurpinar, A. Koehl, A. Manglik, and A.C. Kruse, Crystal structure of the human sigma1 receptor. *Nature* 532 (2016) 527-30.
- [6] J.L. Katz, T. Hiranita, W.C. Hong, M.O. Job, and C.R. McCurdy, A Role for Sigma Receptors in Stimulant Self-Administration and Addiction. *Handbook of experimental pharmacology* 244 (2017) 177-218.
- [7] H. Yano, A. Bonifazi, M. Xu, D.A. Guthrie, S.N. Schneck, A.M. Abramyan, A.D. Fant, W.C. Hong, A.H. Newman, and L. Shi, Pharmacological profiling of sigma 1 receptor ligands by novel receptor homomer assays. *Neuropharmacology* 133 (2018) 264-275.
- [8] T. Hayashi, and T.P. Su, Sigma-1 receptors (sigma(1) binding sites) form raft-like microdomains and target lipid droplets on the endoplasmic reticulum: roles in endoplasmic reticulum lipid compartmentalization and export. *J Pharmacol Exp Ther* 306 (2003) 718-25.
- [9] E. Urizar, H. Yano, R. Kolster, C. Gales, N. Lambert, and J.A. Javitch, CODA-RET reveals functional selectivity as a result of GPCR heteromerization. *Nat Chem Biol* 7 (2011) 624-30.

- [10] K.A. Gromek, F.P. Suchy, H.R. Meddaugh, R.L. Wrobel, L.M. LaPointe, U.B. Chu, J.G. Primm, A.E. Ruoho, A. Senes, and B.G. Fox, The oligomeric states of the purified sigma-1 receptor are stabilized by ligands. *J Biol Chem* 289 (2014) 20333-44.
- [11] S.Y. Tsai, J.Y. Chuang, M.S. Tsai, X.F. Wang, Z.X. Xi, J.J. Hung, W.C. Chang, A. Bonci, and T.P. Su, Sigma-1 receptor mediates cocaine-induced transcriptional regulation by recruiting chromatin-remodeling factors at the nuclear envelope. *Proc Natl Acad Sci U S A* 112 (2015) E6562-70.
- [12] D.O. Sambo, M. Lin, A. Owens, J.J. Lebowitz, B. Richardson, D.A. Jagnarine, M. Shetty, M. Rodriquez, T. Alonge, M. Ali, J. Katz, L. Yan, M. Febo, L.K. Henry, A.W. Bruijnzeel, L. Daws, and H. Khoshbouei, The sigma-1 receptor modulates methamphetamine dysregulation of dopamine neurotransmission. *Nat Commun* 8 (2017) 2228.
- [13] T. Hayashi, and T.P. Su, Sigma-1 receptor chaperones at the ER-mitochondrion interface regulate Ca(2+) signaling and cell survival. *Cell* 131 (2007) 596-610.
- [14] S. Narayanan, R. Bhat, C. Mesangeau, J.H. Poupaert, and C.R. McCurdy, Early development of sigma-receptor ligands. *Future Med Chem* 3 (2011) 79-94.
- [15] J.L. Katz, W.C. Hong, T. Hiranita, and T.P. Su, A role for sigma receptors in stimulant self-administration and addiction. *Behav Pharmacol* 27 (2016) 100-15.
- [16] L. Romero, M. Merlos, and J.M. Vela, Antinociception by Sigma-1 Receptor Antagonists: Central and Peripheral Effects. *Advances in pharmacology (San Diego, Calif.)* 75 (2016) 179-215.
- [17] L. Nguyen, B.P. Lucke-Wold, S. Mookerjee, N. Kaushal, and R.R. Matsumoto, Sigma-1 Receptors and Neurodegenerative Diseases: Towards a Hypothesis of Sigma-1 Receptors as Amplifiers of Neurodegeneration and Neuroprotection. *Adv Exp Med Biol* 964 (2017) 133-152.

- [18] T. Mavylutov, X. Chen, L. Guo, and J. Yang, APEX2- tagging of Sigma 1-receptor indicates subcellular protein topology with cytosolic N-terminus and ER luminal C-terminus. *Protein Cell* 9 (2018) 733-737.
- [19] K. Michelsen, H. Yuan, and B. Schwappach, Hide and run. Arginine-based endoplasmic-reticulum-sorting motifs in the assembly of heteromultimeric membrane proteins. *EMBO Rep* 6 (2005) 717-22.
- [20] A. Frangaj, and Q.R. Fan, Structural biology of GABAB receptor. *Neuropharmacology* 136 (2018) 68-79.
- [21] A.M. Abramyan, H. Yano, M. Xu, L. Liu, S. Naing, A.D. Fant, and L. Shi, The mutation of Glu102 disrupts higher-order oligomerization of the sigma 1 receptor. Submitted.
